# Supplementary material for: Functional Deficiency of Interneurons and Negative BOLD fMRI Response
Source: MDPI journal article supplement (doi:10.3390/cells12050811), 2023-03-06
Supplement: s1 [file s1]

Table S1. The dynamics of the effect of picrotoxin on single neurons after the injection at 15 min. The numbers are represented as percentage of neuron changes which are above or below the indicated 10% or 30% threshold.

|          | 30%*     |          |           | 10%*     |          |           |
|----------|----------|----------|-----------|----------|----------|-----------|
|          | increase | decrease | no change | increase | decrease | no change |
| 25-30min | 44.44**  | 28.89    | 26.67     | 55.56    | 40.00    | 4.44      |
| 30-35min | 51.11    | 28.89    | 20.00     | 55.56    | 35.55    | 8.89      |
| 35-40min | 51.11    | 26.67    | 22.22     | 57.78    | 35.56    | 6.67      |
| 40-45min | 46.67    | 31.11    | 22.22     | 55.56    | 37.78    | 6.67      |
| 45-50min | 44.44    | 28.89    | 26.67     | 51.11    | 35.56    | 13.33     |

\*indicates the change from the baseline before injection

\*\* the percent of neurons which had increase, decrease or no change in the resting state activity after picrotoxin according to the corresponding threshold. Note, there is no statistical significance between time intervals.
